# Supplementary material for: Glucosylsphingosine Causes Hematological and Visceral Changes in Mice—Evidence for a Pathophysiological Role in Gaucher Disease
Source: PubMed Central journal article supplement (PMC5666873; doi:10.3390/ijms18102192), 2017-10-20
Supplement: ijms-18-02192-s001.pdf [file ijms-18-02192-s001.pdf]

**Table S1**

**A**

| Median        | body weight on day of analysis | AST (GOT) | Leuko-cytes | Erythro-cytes | Hb   | PCV  | MCV  | MCH  | MCHC | Thrombo-cytes | relative liver weight | relative spleen weight |
|---------------|--------------------------------|-----------|-------------|---------------|------|------|------|------|------|---------------|-----------------------|------------------------|
|               | g                              | U/l       | G/l         | T/l           | g/dl | %    | fl   | pg   | g/dl | G/l           | g/100g b.w.           | g/kg b.w.              |
| baseline      | 25.6                           | 66.0      | 6.4         | 8.6           | 12.9 | 39.0 | 45.0 | 14.9 | 33.0 | 869.5         | n.d.                  | n.d.                   |
| 4 wk vehicle  | 28.7                           | 56.0      | 7.7         | 9.0           | 13.2 | 40.5 | 45.5 | 14.9 | 32.0 | 896.0         | n.d.                  | n.d.                   |
| 4 wk lysogb1  | 27.3                           | 47.0      | 8.2         | 8.5           | 12.3 | 37.5 | 44.0 | 14.4 | 33.0 | 1046.0        | n.d.                  | n.d.                   |
| 8 wk vehicle  | 30.2                           | 43.5      | 9.6         | 9.3           | 13.5 | 41.5 | 44.0 | 14.6 | 33.0 | 1065.0        | 4.8                   | 2.5                    |
| 8 wk lysogb1  | 29.7                           | 55.5      | 8.4         | 8.6           | 12.4 | 37.5 | 43.5 | 14.7 | 33.0 | 1226.0        | 5.3                   | 3.3                    |
| 12 wk vehicle | 32.7                           | 68.0      | 4.8         | 8.6           | 12.7 | 37.0 | 44.0 | 15.0 | 35.0 | 1268.0        | 5.0                   | 2.4                    |
| 12 wk lysogb1 | 32.5                           | 75.0      | 5.8         | 8.3           | 12.2 | 36.0 | 43.0 | 14.6 | 34.0 | 1157.0        | 5.2                   | 2.9                    |

**B**

| Median        | GM-CSF | IFN-gamma | IL-1 beta | IL-10 | IL-12p70 | IL-13 | IL-17A | IL-18  | IL-2  | IL-22 | IL-23 | IL-27 | IL-4  | IL-5  | IL-6  | IL-9  | TNF-alpha |
|---------------|--------|-----------|-----------|-------|----------|-------|--------|--------|-------|-------|-------|-------|-------|-------|-------|-------|-----------|
|               | pg/ml  | pg/ml     | pg/ml     | pg/ml | pg/ml    | pg/ml | pg/ml  | pg/ml  | pg/ml | pg/ml | pg/ml | pg/ml | pg/ml | pg/ml | pg/ml | pg/ml | pg/ml     |
| baseline      | 0,00   | 0,85      | 0,46      | 0,00  | 0,83     | 0,00  | 7,14   | 109,82 | 1,30  | 37,73 | 9,28  | 9,66  | 1,35  | 6,15  | 0,59  | 0,00  | 0,00      |
| 4wk vehicle   | 0,00   | 0,27      | 0,23      | 0,00  | 0,45     | 0,00  | 3,43   | 100,23 | 0,00  | 10,23 | 4,78  | 5,78  | 0,81  | 5,25  | 3,31  | 0,00  | 0,00      |
| 4 wk lysogb1  | 4,41   | 0,85      | 0,46      | 0,00  | 1,21     | 0,45  | 4,22   | 136,52 | 1,30  | 24,71 | 5,40  | 6,56  | 1,42  | 7,02  | 16,85 | 0,00  | 2,58      |
| 8 wk vehicle  | 3,33   | 1,22      | 0,74      | 0,00  | 0,95     | 0,31  | 2,99   | 167,84 | 4,22  | 33,52 | 5,40  | 8,87  | 1,56  | 7,88  | 5,90  | 0,00  | 2,33      |
| 8 wk lysogb1  | 4,41   | 1,23      | 1,03      | 0,00  | 1,21     | 0,62  | 5,28   | 167,84 | 10,09 | 37,73 | 6,74  | 9,65  | 1,42  | 6,15  | 16,64 | 0,00  | 2,45      |
| 12 wk vehicle | 3,33   | 0,66      | 0,07      | 0,00  | 0,95     | 0,15  | 2,64   | 142,83 | 0,00  | 24,33 | 4,01  | 9,66  | 1,57  | 4,78  | 7,06  | 0,00  | 0,08      |
| 12 wk lysogb1 | 5,20   | 1,41      | 1,29      | 0,00  | 1,34     | 0,31  | 4,95   | 173,61 | 0,00  | 24,91 | 20,63 | 9,27  | 2,08  | 7,02  | 20,71 | 0,00  | 1,20      |

**Table S1.** Extensive analysis of blood parameters and plasma cytokines. **(A).** Hb and Hct values appeared to be significantly changed after 4 and 8 weeks of treatment when compared to vehicle-treated control animals as well as baseline value. After 12 weeks no further regression of Hct values was observed. Leukocyte and thrombocyte counts and red-cell parameters with the exception of MCH appeared normal in the treated mice. However, thrombocytes showed a trend to elevate throughout the experimental phase compared to baseline, but not between groups. Spleen weights were moderately increased; **(B).** Cytokine analysis was carried out using ProcartaPlex® Multiplex Immunoassay. Median IL-1 $\beta$  and TNF $\alpha$  were elevated compared with vehicle-treated controls. \*) Data have been tested for differences using Mann-Whitney test and deemed statistically significant (indicated in red) when  $p < 0.05$  compared to control group and baseline value.
